# Supplementary material for: Parental Health and Flourishing Among Young US Children
Source: PubMed Central journal article supplement (PMC11581517; doi:10.1001/jamanetworkopen.2024.43975), 2024-10-28
Supplement: jamanetwopen-e2443975-s001.pdf [file jamanetwopen-e2443975-s001.pdf]

## Data Sharing Statement

Polnaszek. Parental Health and Flourishing Among Young US Children. *JAMA Netw Open*.  
Published October 28, 2024. doi:10.1001/jamanetworkopen.2024.43975

### Data

**Data available:** Yes

**Data types:** Data dictionary

**How to access data:** Available from NSCH website

**When available:** With publication

### Supporting Documents

**Document types:** Statistical/analytic code

**How to access documents:** [Bpolnaszek@mcw.edu](mailto:Bpolnaszek@mcw.edu)

**When available:** With publication

### Additional Information

**Who can access the data:** Anyone requesting

**Types of analyses:** Any purpose

**Mechanisms of data availability:** With investigator support
